# Supplementary material
Source: publisher site journal article supplement (https://www.dovepress.com/article/299864)
Supplement: Supplementary file 1 [file get_supplementary_file.php]

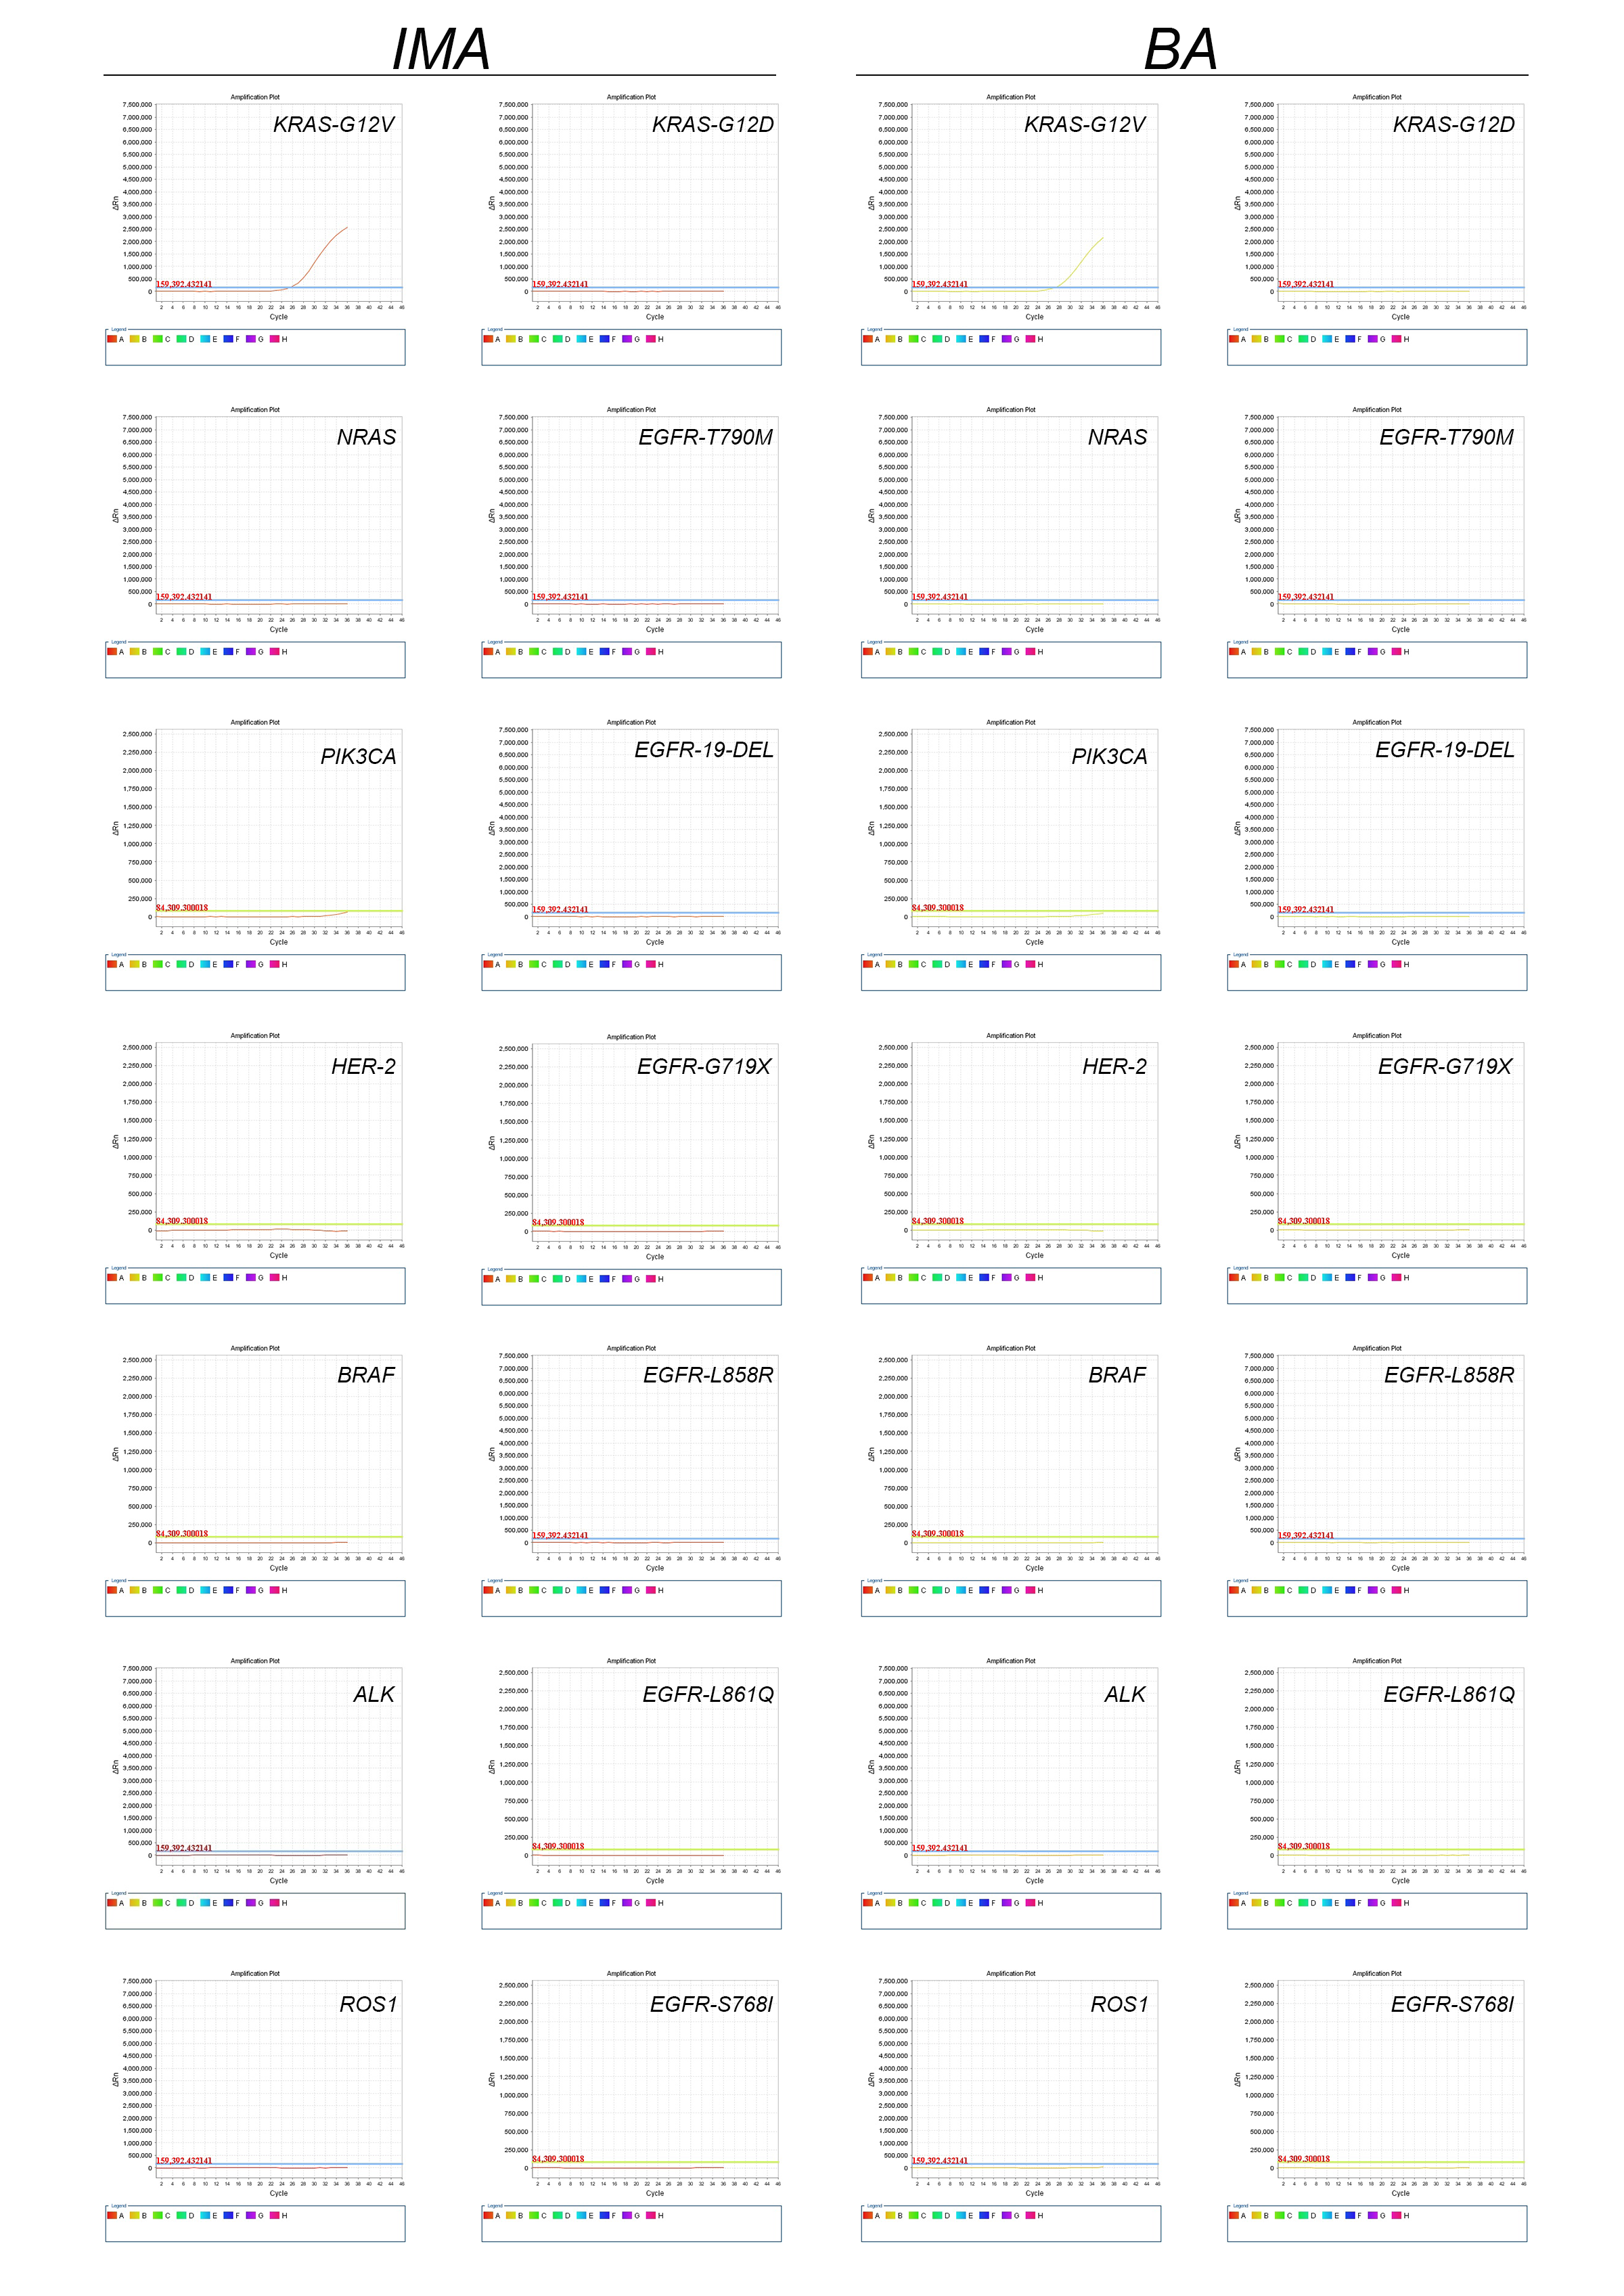


**Supplement Figure 1**. Genetic analysis of *EGFR, ALK, ROS1, KRAS, NRAS, PIK3, HER2,* and *BRAF* genes with quantitative reverse-transcript polymerase chain reaction (qRT-PCR) in the invasive mucinous adenocarcinoma (IMA) and bronchiolar adenoma (BA) tissues.
